# Supplementary material for: Hypnotics' association with mortality or cancer: a matched cohort study
Source: HighWire-hosted journal article supplement (doi:10.1136/bmjopen-2012-000850), 2012-01-01
Supplement: bmjopen-2012-000850-s1.pdf [file bmjopen-2012-000850-s1.pdf]

Page numbers for “Increased Mortality with Sedative-Hypnotics: Unsafe At Any Dose?”  
 BMJ.2011.001445, refer to the pages of the 53-page \*.PDF file uploaded on October 8, 2011.

STROBE statement checklist of items that should be included in reports of observational studies

|                           | <b>Item No</b> | <b>Recommendation</b>                                                                                                                                                                                                                                                                                                                                                                                                                                                                                                                                                                                                                                                                                                           |
|---------------------------|----------------|---------------------------------------------------------------------------------------------------------------------------------------------------------------------------------------------------------------------------------------------------------------------------------------------------------------------------------------------------------------------------------------------------------------------------------------------------------------------------------------------------------------------------------------------------------------------------------------------------------------------------------------------------------------------------------------------------------------------------------|
| <b>Title and abstract</b> |                |                                                                                                                                                                                                                                                                                                                                                                                                                                                                                                                                                                                                                                                                                                                                 |
|                           |                | (a) Indicate the study's design with a commonly used term in the title or the abstract <b>page 3, line 15</b>                                                                                                                                                                                                                                                                                                                                                                                                                                                                                                                                                                                                                   |
|                           | 1              | (b) Provide in the abstract an informative and balanced summary of what was done and what was found <b>page 3, but note that the web site restricted abstracts to 250 words, when BMJ instructions elsewhere allow a longer abstract for research reports.</b>                                                                                                                                                                                                                                                                                                                                                                                                                                                                  |
| <b>Introduction</b>       |                |                                                                                                                                                                                                                                                                                                                                                                                                                                                                                                                                                                                                                                                                                                                                 |
| Background/rationale      | 2              | Explain the scientific background and rationale for the investigation being reported <b>page 5</b>                                                                                                                                                                                                                                                                                                                                                                                                                                                                                                                                                                                                                              |
| Objectives                | 3              | State specific objectives, including any prespecified hypotheses <b>Page 5-6, the hypotheses that deaths and cancers would be associated with hypnotic use was being replicated, but no superiority of zolpidem to other hypnotics was hypothesized.</b>                                                                                                                                                                                                                                                                                                                                                                                                                                                                        |
| <b>Methods</b>            |                |                                                                                                                                                                                                                                                                                                                                                                                                                                                                                                                                                                                                                                                                                                                                 |
| Study design              | 4              | Present key elements of study design early in the paper <b>pages 6-8</b>                                                                                                                                                                                                                                                                                                                                                                                                                                                                                                                                                                                                                                                        |
| Setting                   | 5              | Describe the setting, locations, and relevant dates, including periods of recruitment, exposure, follow-up, and data collection <b>Page 6</b>                                                                                                                                                                                                                                                                                                                                                                                                                                                                                                                                                                                   |
| Participants              | 6              | (a) <i>Cohort study</i> ? Give the eligibility criteria, and the sources and methods of selection of participants. Describe methods of follow-up <b>Page 6</b> <i>Case-control study</i> ? Give the eligibility criteria, and the sources and methods of case ascertainment and control selection. Give the rationale for the choice of cases and controls <i>Cross sectional study</i> ? Give the eligibility criteria, and the sources and methods of selection of participants<br><br>(b) <i>Cohort study</i> ? For matched studies, give matching criteria and number of exposed and unexposed <b>Pages 6-7</b> <i>Case-control study</i> ? For matched studies, give matching criteria and the number of controls per case |
| Variables                 | 7              | Clearly define all outcomes, exposures, predictors, potential confounders, and effect modifiers. Give diagnostic criteria, if applicable <b>Covariate categories are in Table 1, pages 22-23. Confounders are defined in Supplementary Table 2, page 37-38.</b>                                                                                                                                                                                                                                                                                                                                                                                                                                                                 |

|                              | <b>Item No</b> | <b>Recommendation</b>                                                                                                                                                                                                                                                                                                                                                                                                                                                                                                                                 |
|------------------------------|----------------|-------------------------------------------------------------------------------------------------------------------------------------------------------------------------------------------------------------------------------------------------------------------------------------------------------------------------------------------------------------------------------------------------------------------------------------------------------------------------------------------------------------------------------------------------------|
| Data sources/<br>measurement | 8*             | For each variable of interest, give sources of data and details of methods of assessment (measurement). Describe comparability of assessment methods if there is more than one group <b>Page 6 and Page 36.</b>                                                                                                                                                                                                                                                                                                                                       |
| Bias                         | 9              | Describe any efforts to address potential sources of bias <b>Page 6-7, 9, 37-38, table 7 page 41.</b>                                                                                                                                                                                                                                                                                                                                                                                                                                                 |
| Study size                   | 10             | Explain how the study size was arrived at <b>Page 6-7</b>                                                                                                                                                                                                                                                                                                                                                                                                                                                                                             |
| Quantitative variables       | 11             | Explain how quantitative variables were handled in the analyses. If applicable, describe which groupings were chosen and why<br>(a) Describe all statistical methods, including those used to control for confounding <b>page 7-8, pages 37-8</b><br>(b) Describe any methods used to examine subgroups and interactions <b>13 tables and 3 figures describe subgroups and interactions</b>                                                                                                                                                           |
| Statistical methods          | 12             | (c) Explain how missing data were addressed <b>Table 1, pages 22-23, shows that data-missing were entered as a separate category in Cox Models.</b><br>(d) <i>Cohort study?</i> If applicable, explain how loss to follow-up was addressed <b>page 35</b> <i>Case-control study?</i> If applicable, explain how matching of cases and controls was addressed <i>Cross sectional study?</i> If applicable, describe analytical methods taking account of sampling strategy<br>(e) Describe any sensitivity analyses <b>page 43 and numerous tables</b> |
| <b>Results</b>               |                |                                                                                                                                                                                                                                                                                                                                                                                                                                                                                                                                                       |
| Participants                 | 13*            | (a) Report numbers of individuals at each stage of study?eg numbers potentially eligible, examined for eligibility, confirmed eligible, included in the study, completing follow-up, and analysed <b>Pages 6-7</b><br>(b) Give reasons for non-participation at each stage <b>Pages 6-7</b><br>(c) Consider use of a flow diagram<br>(a)Give characteristics of study participants (eg demographic, clinical, social) and information on exposures and potential confounders <b>pages 23-27</b>                                                       |
| Descriptive data             | 14*            | (b) Indicate number of participants with missing data for each variable of interest <b>pages 23-25</b><br>(c) <i>Cohort study?</i> Summarise follow-up time (eg average and total amount) <b>page 23</b>                                                                                                                                                                                                                                                                                                                                              |
| Outcome data                 | 15*            | <i>Cohort study?</i> Report numbers of outcome events or summary                                                                                                                                                                                                                                                                                                                                                                                                                                                                                      |

|                          | <b>Item<br/>No</b> | <b>Recommendation</b>                                                                                                                                                                                                                                                                                                            |
|--------------------------|--------------------|----------------------------------------------------------------------------------------------------------------------------------------------------------------------------------------------------------------------------------------------------------------------------------------------------------------------------------|
|                          |                    | measures over time <a href="#">page 23, 30, 39, 43, 45, 47</a>                                                                                                                                                                                                                                                                   |
|                          |                    | <i>Case-control study?</i> Report numbers in each exposure category, or summary measures of exposure                                                                                                                                                                                                                             |
|                          |                    | <i>Cross sectional study?</i> Report numbers of outcome events or summary measures                                                                                                                                                                                                                                               |
| Main results             | 16                 | (a) Report the numbers of individuals at each stage of the study?eg numbers potentially eligible, examined for eligibility, confirmed eligible, included in the study, completing follow-up, and analysed <a href="#">page 6-7</a><br>(b) Give reasons for non-participation at each stage<br>(c) Consider use of a flow diagram |
| Other analyses           | 17                 | Report other analyses done?eg analyses of subgroups and interactions, and sensitivity analyses <a href="#">throughout</a>                                                                                                                                                                                                        |
| <b>Discussion</b>        |                    |                                                                                                                                                                                                                                                                                                                                  |
| Key results              | 18                 | Summarise key results with reference to study objectives <a href="#">pages 10-11</a>                                                                                                                                                                                                                                             |
| Limitations              | 19                 | Discuss limitations of the study, taking into account sources of potential bias or imprecision. Discuss both direction and magnitude of any potential bias <a href="#">11, 13-14</a>                                                                                                                                             |
| Interpretation           | 20                 | Give a cautious overall interpretation of results considering objectives, limitations, multiplicity of analyses, results from similar studies, and other relevant evidence <a href="#">pages 14-15</a>                                                                                                                           |
| Generalisability         | 21                 | Discuss the generalisability (external validity) of the study results <a href="#">pages 33-34</a>                                                                                                                                                                                                                                |
| <b>Other information</b> |                    |                                                                                                                                                                                                                                                                                                                                  |
| Funding                  | 22                 | Give the source of funding and the role of the funders for the present study and, if applicable, for the original study on which the present article is based <a href="#">page 15, lines 9-10</a>                                                                                                                                |

\*Give information separately for cases and controls in case-control studies and, if applicable, for exposed and unexposed groups in cohort and cross sectional studies.

The STROBE checklist is best used in conjunction with the explanation and elaboration article.<sup>18-20</sup> This article and separate versions of the checklist for cohort, case-control, and cross sectional studies are available at [www.strobe-statement.org](http://www.strobe-statement.org)
